# Supplementary material for: Clinical and biological heterogeneities in triple-negative breast cancer reveals a non-negligible role of HER2-low
Source: Springer Nature journal article supplement (doi:10.1186/s13058-023-01639-y), 2023-03-30
Supplement: 13058_2023_1639_MOESM2_ESM.pdf [file 13058_2023_1639_MOESM2_ESM.pdf]

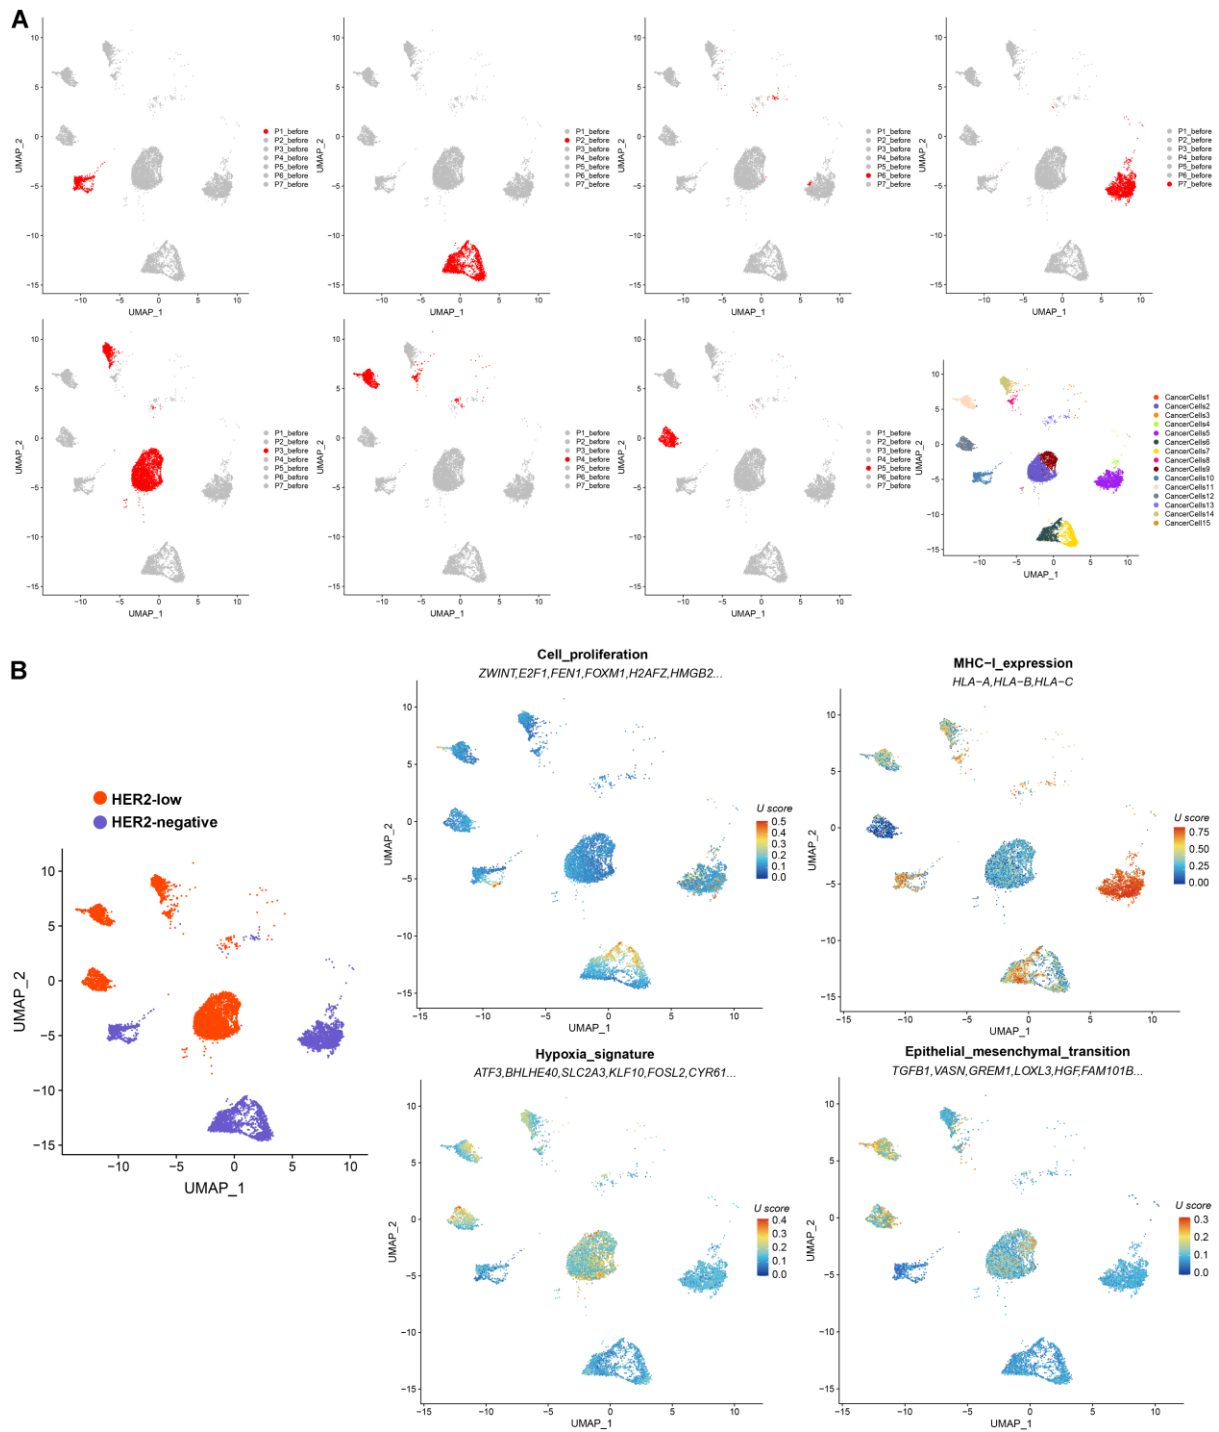

**Figure S2 - Tumor cells in HER2<sup>neg</sup> TNBC and HER2<sup>low</sup> TNBC harbor distinct biological properties.**

**A** U-MAPs of tumor clusters in different TNBC patients with different HER2 status. HER2<sup>neg</sup> TNBC: P1, P2, P6 and P7; HER2<sup>low</sup> TNBC: P3, P4 and P5.

**B** Assessment of the expression of four key biological functions in different tumor clusters showing that HER2<sup>neg</sup> TNBC and HER2<sup>low</sup> TNBC have different tumor properties.
