# Supplementary material for: Clinical and biological heterogeneities in triple-negative breast cancer reveals a non-negligible role of HER2-low
Source: Springer Nature journal article supplement (doi:10.1186/s13058-023-01639-y), 2023-03-30
Supplement: 13058_2023_1639_MOESM3_ESM.pdf [file 13058_2023_1639_MOESM3_ESM.pdf]

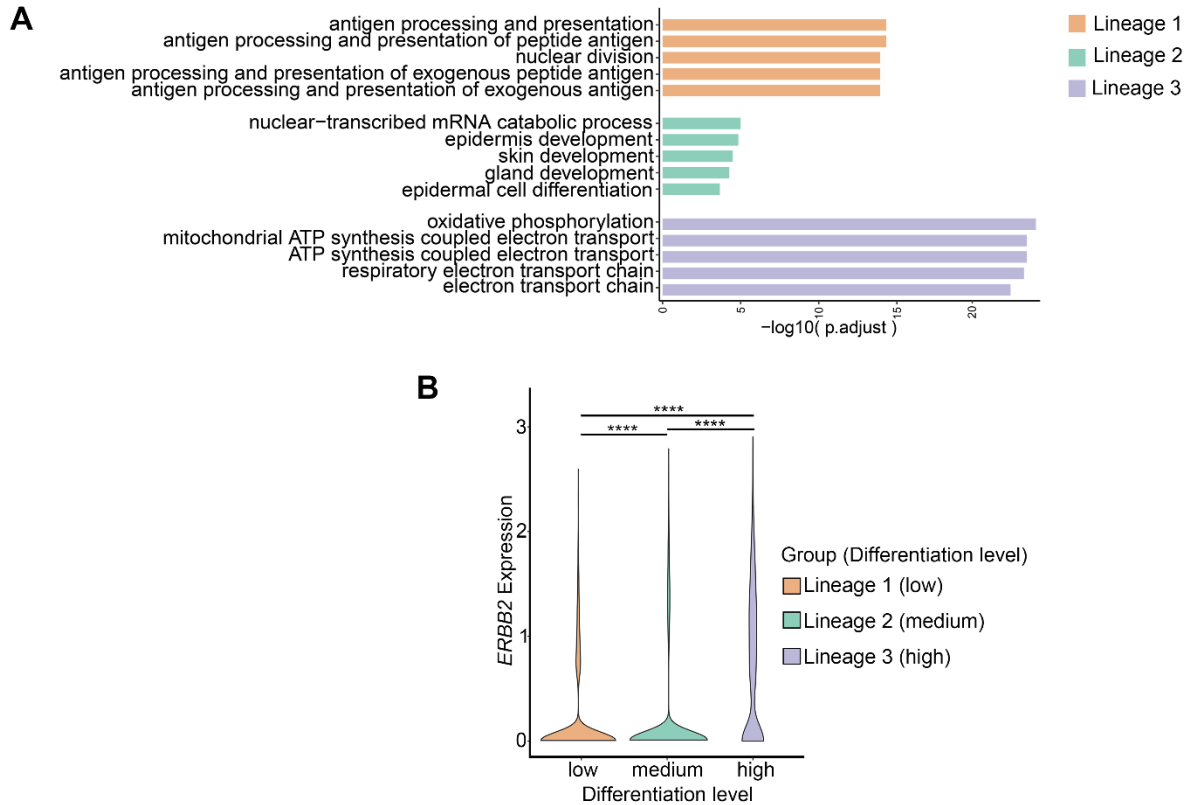

**Figure S3 - Tumor cell subclusters with different differentiation status had distinct features and *ERBB2* levels.**

- A Go enrichment analysis of the three groups of tumor cells with different levels of differentiation in TNBC.
- B Violin plot depicts the expression level of *ERBB2* in three groups of tumor cells with different levels (low, medium and high) of differentiation in TNBC, showing that the higher expression level of *ERBB2*, the higher differentiation stage of tumor cells. \*\*\*\*,  $P < 0.0001$ .
