# Supplementary material for: Clinical and biological heterogeneities in triple-negative breast cancer reveals a non-negligible role of HER2-low
Source: Springer Nature journal article supplement (doi:10.1186/s13058-023-01639-y), 2023-03-30
Supplement: 13058_2023_1639_MOESM4_ESM.pdf [file 13058_2023_1639_MOESM4_ESM.pdf]

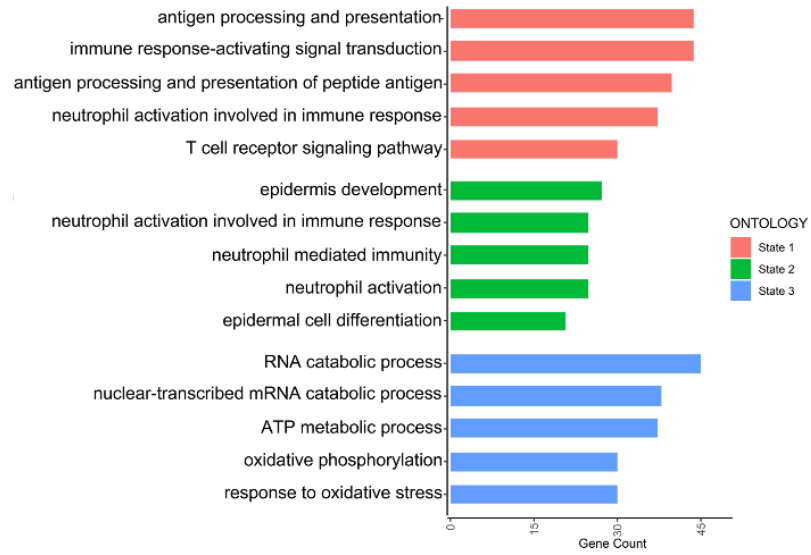

**Figure S4 - GO enrichment pathways of highly expressed genes of all tumor cells at three evolutionary states during the pseudotime.**

Shown are BP enrichment terms.
