# Supplementary material for: Clinical and biological heterogeneities in triple-negative breast cancer reveals a non-negligible role of HER2-low
Source: Springer Nature journal article supplement (doi:10.1186/s13058-023-01639-y), 2023-03-30
Supplement: 13058_2023_1639_MOESM5_ESM.pdf [file 13058_2023_1639_MOESM5_ESM.pdf]

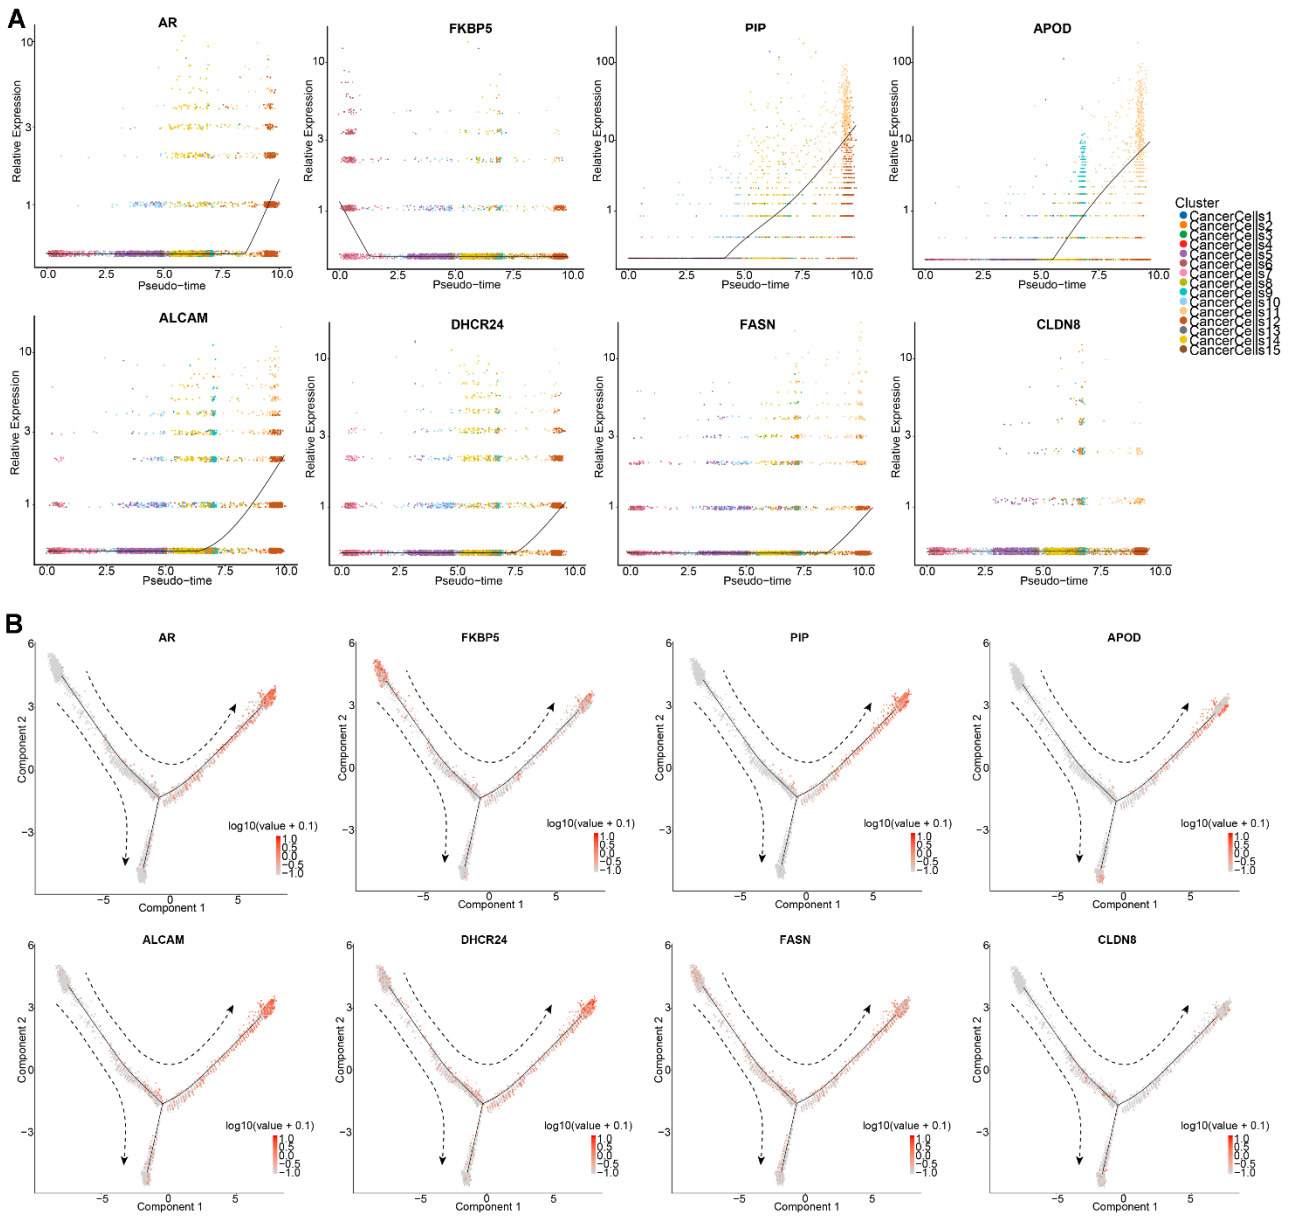

**Figure S5 - The expression characteristics of AR and AR target genes in the pseudotime trajectory.**  
**A** Changes in the relative expression levels of AR and AR target genes over pseudotime.  
**B** The expression of AR and AR target genes along the pseudotime trajectory. The arrows represent the direction of the pseudotime trajectory.
