# Supplementary material for: Clinical and biological heterogeneities in triple-negative breast cancer reveals a non-negligible role of HER2-low
Source: Springer Nature journal article supplement (doi:10.1186/s13058-023-01639-y), 2023-03-30

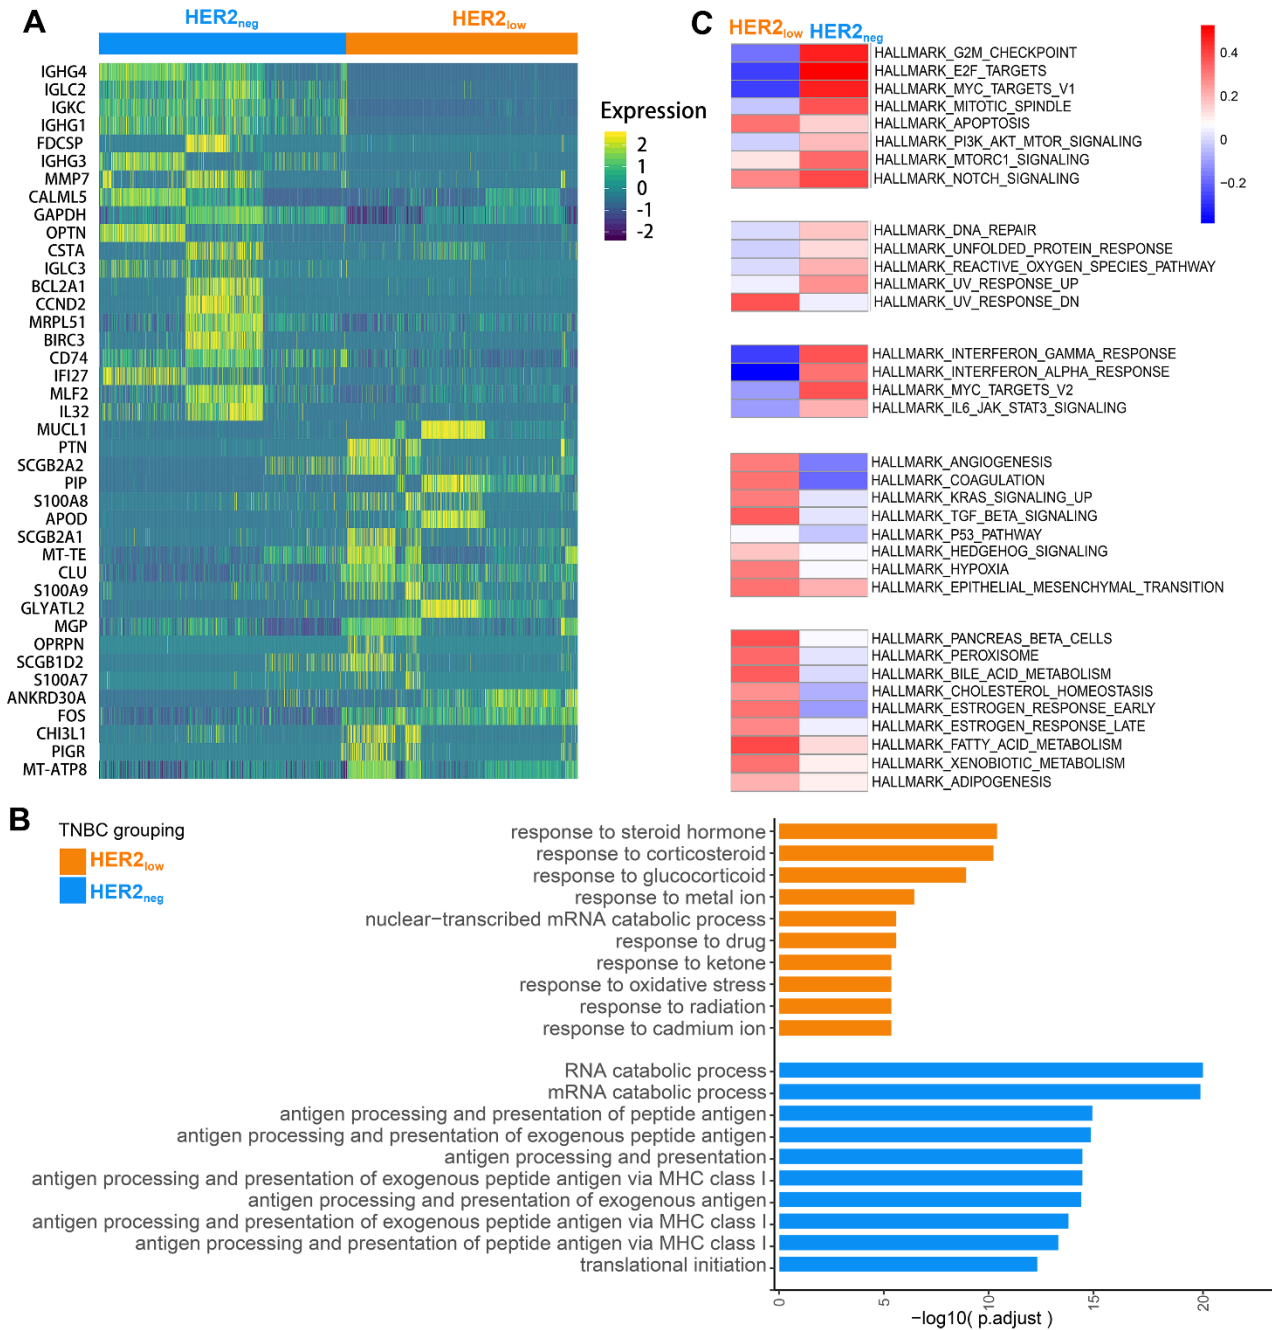

Supplement: 13058_2023_1639_MOESM6_ESM.pdf [file 13058_2023_1639_MOESM6_ESM.pdf]
